# Supplementary material
Source: PubMed Central journal article supplement (PMC11422820)
Supplement: NIHPP2023.09.22.23294942v3-supplement-1.pdf [file NIHPP2023.09.22.23294942v3-supplement-1.pdf]

# Radiomic-Based Prediction of Lesion-Specific Systemic Treatment Response in Metastatic Disease

## Supplementary Material

Caryn Geady<sup>1,2</sup>, Farnoosh Abbas-Aghababazadeh<sup>1</sup>, Andres Kohan<sup>1</sup>, Scott Schuetze<sup>3</sup>, David Shultz, Benjamin Haibe-Kains<sup>1,2,4,5,6,7</sup>

<sup>1</sup>Princess Margaret Cancer Centre, University Health Network, Toronto, Canada

<sup>2</sup>Medical Biophysics, University of Toronto, Toronto, Canada

<sup>3</sup>Department of Medicine, University of Michigan, Ann Arbor, MI, USA

<sup>4</sup>Vector Institute for Artificial Intelligence, Toronto, Canada

<sup>5</sup>Ontario Institute for Cancer Research, Toronto, Canada

<sup>6</sup>Department of Computer Science, University of Toronto, Toronto, Canada

<sup>7</sup>Department of Biostatistics, Dalla Lana School of Public Health, Toronto, Canada

### Selected Features

**Table S1:** Summary of radiomic features included in best performing models for the prediction of pulmonary lesion-specific systemic treatment response to DM.

| Group       | Radiomic Feature              |             |                                   |
|-------------|-------------------------------|-------------|-----------------------------------|
|             | Filter                        | Class       | Name                              |
| All lesions | Wavelet-LHL                   | First Order | Variance (exterior rim)           |
|             | LOG ( $\sigma = 3\text{mm}$ ) | GLDM        | Grey Level Variance (lesion core) |
|             | -                             | Shape       | Voxel Volume                      |
| Z  ≤ 3      | Wavelet-LHL                   | First Order | Variance (exterior rim)           |
|             | LOG ( $\sigma = 3\text{mm}$ ) | GLDM        | Grey Level Variance (lesion core) |
|             | LOG ( $\sigma = 3\text{mm}$ ) | First Order | 10th Percentile (exterior rim)    |
|             | -                             | Shape       | Voxel Volume                      |

**Table S2:** Summary of radiomic features included in best performing models for the prediction of pulmonary lesion-specific systemic treatment response to DE.

| Group        | Radiomic Feature              |             |                                    |
|--------------|-------------------------------|-------------|------------------------------------|
|              | Filter                        | Class       | Name                               |
| All lesions  | LOG ( $\sigma = 4\text{mm}$ ) | GLDM        | Grey Level Variance (interior rim) |
|              | Logarithm                     | GLCM        | Sum of Squares (lesion core)       |
|              | -                             | Shape       | Voxel Volume                       |
| $ Z  \leq 3$ | Wavelet-HHL                   | First Order | Variance (lesion core)             |
|              | Wavelet-LLH                   | First Order | Mean (lesion core)                 |
|              | Logarithm                     | First Order | Mean (lesion core)                 |
|              | Wavelet-LHL                   | GLCM        | Cluster Tendency (lesion core)     |
|              | -                             | Shape       | Voxel Volume                       |
| $ Z  > 3$    | Logarithm                     | GLCM        | Sum of Squares (lesion core)       |
|              | Logarithm                     | First Order | Minimum (interior rim)             |
|              | Wavelet-HHL                   | First Order | Variance (lesion core)             |
|              | Wavelet-LHL                   | GLCM        | Cluster Tendency (lesion core)     |
|              | -                             | Shape       | Voxel Volume                       |

### *Hyperparameter Tuning*

Hyperparameter tuning was performed with GridSearchCV in Python. This process systematically explores optimal hyperparameters for machine learning models. It involves cross-validation, where the dataset is divided into folds, and each hyperparameter combination is assessed using a separate fold. GridSearchCV automates this process by exhaustively searching through a predefined grid of hyperparameter values to select the best-performing combination based on a specified evaluation metric. The predefined grid of hyperparameters used for this study are in **Table S3**.

**Table S3:** *Predefined grid of hyperparameters used for GridSearchCV used in this study.*

| <b>Hyperparameter</b> | <b>Options</b>                                                        |
|-----------------------|-----------------------------------------------------------------------|
| 'penalty'             | ['l1', 'l2', 'elasticnet', None]                                      |
| 'solver'              | ['lbfgs', 'liblinear', 'newton-cg', 'newton-cholesky', 'sag', 'saga'] |
| 'tol'                 | [1e-4, 1e-5, 1e-6, 1e-7, 1e-8, 1e-9]                                  |
| 'max_iter'            | [50,100,150,200]                                                      |
